# Supplementary material for: Polylactic acid/wood-based in situ polymerized densified composite material
Source: Royal Society of Chemistry journal article supplement (doi:10.1039/d3ma00550j), 2023-01-01
Supplement: d3ma00550j1.pdf [file d3ma00550j1.pdf]

## Supporting Information

### Poly(lactic acid)/wood-based in-situ polymerized densified composite material

Akash Madhav Gondaliya,<sup>a</sup> Kieran Foster, E. Johan Foster<sup>\*a</sup>

<sup>a</sup> Chemical and biological engineering, University of British Columbia, Vancouver, Canada

\* Corresponding author: E. Johan Foster, [johan.foster@ubc.ca](mailto:johan.foster@ubc.ca)

### Supplementary Results:

It was found that catalyst-free polycondensation yielded the oligomers with the degree of polymerization ranging from 3-mer to 8-mer, with a peak intensity at the 5-mer as calculated in Table S1.

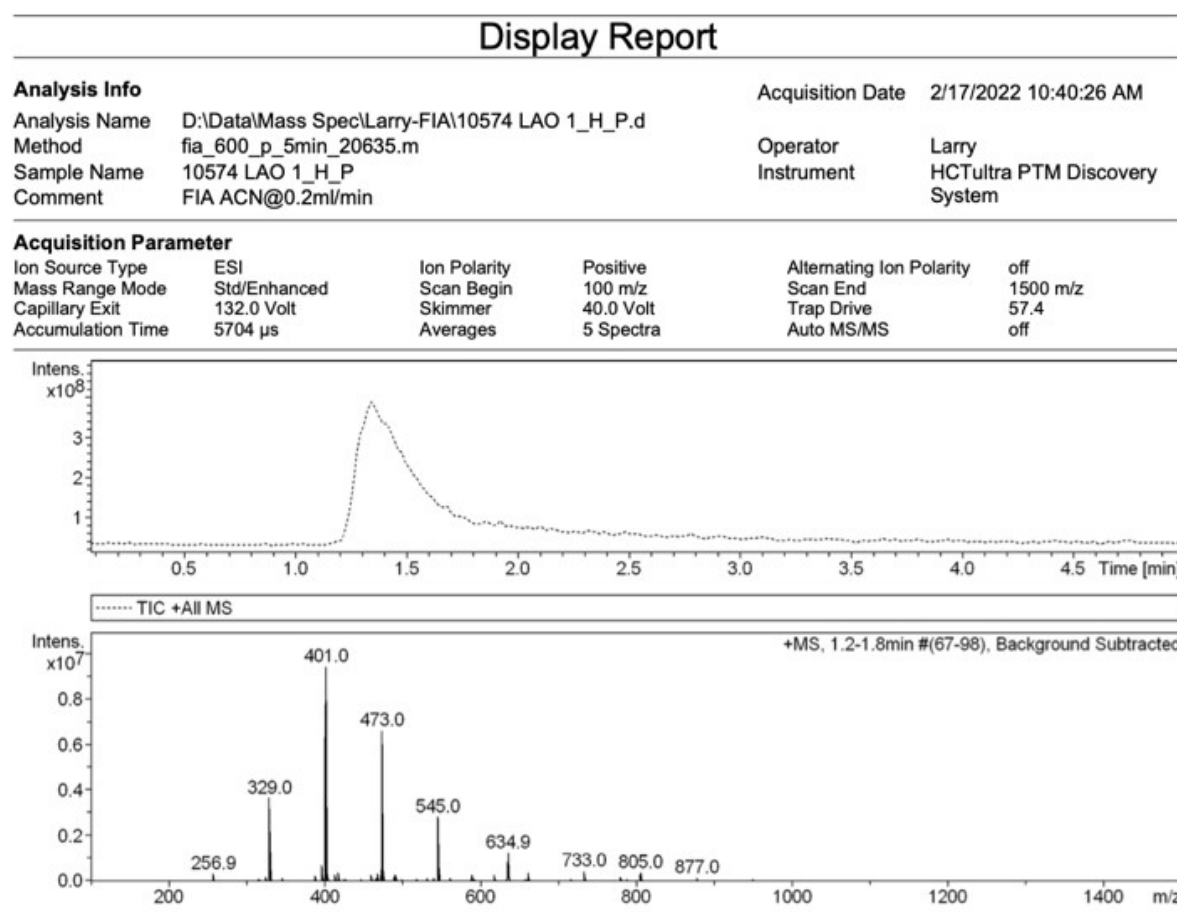

**Figure S1:** LC-MS data for the lactic acid oligomers (LAO) done using ESI with positive ion polarity. Top: Total ion chromatogram (TIC) labeled with (X-axis) retention time; Bottom: LC-MS

spectrum from 1.1 min to 1.7 mins shown oligomer signal from 3mer to 8mer with m/z 256.9–634.9 full-scale mass spectrum of LAO standard solution.

**Table S1:** LC-MS data showing the list of various Lactic Acid oligomers found ranging from 3mer to 8mer and their molecular weight.

| Oligomer | Molecular formula                               | Calculated MW (g/mol) | Calculated [M+Na] <sup>+</sup> (m/z) | Observed [M+Na] <sup>+</sup> (m/z) |
|----------|-------------------------------------------------|-----------------------|--------------------------------------|------------------------------------|
| 3mer     | C <sub>9</sub> H <sub>14</sub> O <sub>7</sub>   | 234.2                 | 256.9                                | 256.9                              |
| 4mer     | C <sub>12</sub> H <sub>18</sub> O <sub>9</sub>  | 306.3                 | 329.2                                | 329                                |
| 5mer     | C <sub>15</sub> H <sub>22</sub> O <sub>11</sub> | 378.3                 | 401.2                                | 401                                |
| 6mer     | C <sub>18</sub> H <sub>26</sub> O <sub>13</sub> | 450.4                 | 473.3                                | 473                                |
| 7mer     | C <sub>21</sub> H <sub>30</sub> O <sub>15</sub> | 522.5                 | 545.4                                | 545                                |
| 8mer     | C <sub>24</sub> H <sub>34</sub> O <sub>17</sub> | 594.5                 | 617.4                                | 634.9                              |

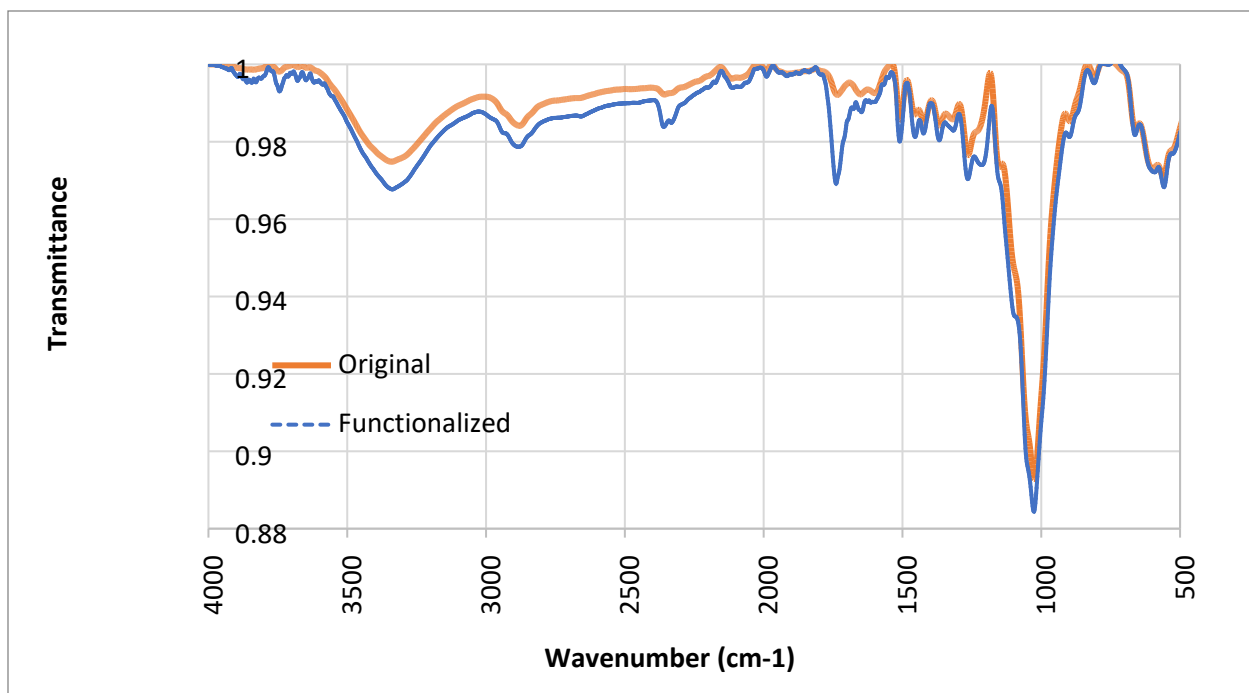

**Figure S2:** FTIR-ATR spectra of original wood and Functionalized densified wood after (OLA impregnation and heat treatment)
